# Supplementary material for: PANI/MoO3−x shell–core composites with enhanced rate and cycling performance for flexible solid-state supercapacitors and electrochromic applications
Source: Royal Society of Chemistry journal article supplement (doi:10.1039/d1nj01157j), 2021-01-01
Supplement: d1nj01157j1.pdf [file d1nj01157j1.pdf]

## Electronic Supplementary Information

### **PANI/MoO<sub>3-x</sub> shell-core composites with enhanced rate and cycling performance for flexible solid-state supercapacitors and electrochromic applications**

Yan Sui<sup>a, b</sup>, Yongjun Ma<sup>a, b</sup>, Yanyu Gao<sup>a, b</sup>, Jia Song<sup>a, b</sup>, Yuncheng Ye<sup>a, b</sup>, Haijun Niu<sup>a, b</sup>, Weijing Ma<sup>a, b</sup>, Pengxue Zhang<sup>a, b</sup> and Chuanli Qin<sup>\*a, b</sup>

<sup>a</sup> School of Chemistry and Materials Science, Heilongjiang University, Harbin, 150080, China

<sup>b</sup> Key Laboratory of Chemical Engineering Process & Technology for High-efficiency Conversion, College of Heilongjiang Province, Harbin, 150080, People's Republic of China

\*Corresponding author.

E-mail: qinchuanli@hlju.edu.cn

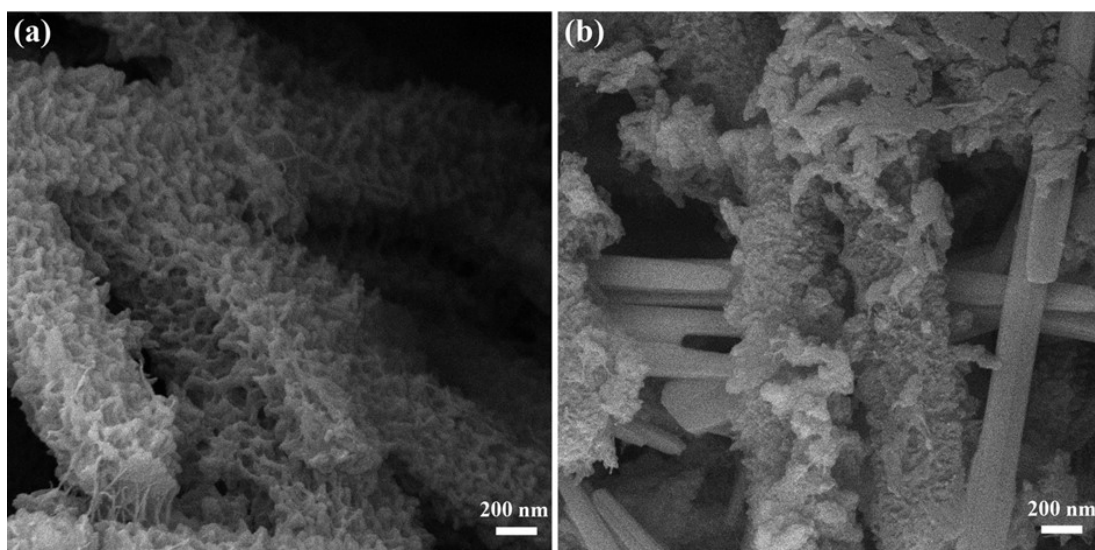

Fig. S1 SEM images of (a) PANI/MoO<sub>3-x</sub>-1 and (b) PANI/MoO<sub>3-x</sub>-3.

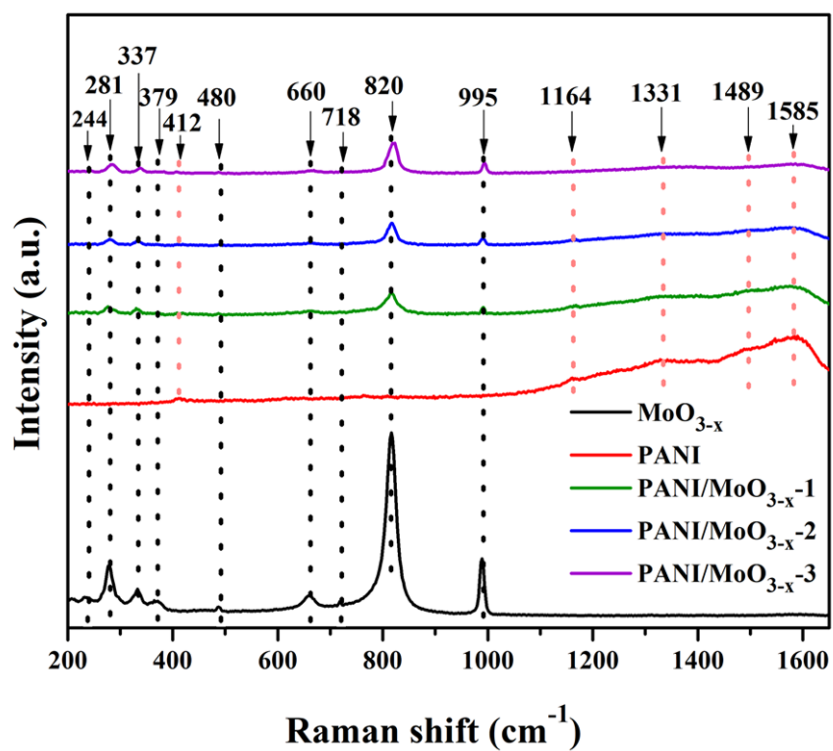

Fig. S2 Raman spectra of samples.

**Table S1** FT-IR analyses of samples

| Samples                    | C=C stretching vibration of quinonoid ring | C=C stretching vibration of benzenoid ring | C-N stretching vibration of benzenoid ring | C=N stretching vibration of quinonoid ring | C-H out-of-plane bending vibration of benzenoid ring | Mo=O symmetric stretching vibration | Mo-O-Mo asymmetry stretching vibration | Mo-O-Mo symmetry stretching vibration |
|----------------------------|--------------------------------------------|--------------------------------------------|--------------------------------------------|--------------------------------------------|------------------------------------------------------|-------------------------------------|----------------------------------------|---------------------------------------|
| MoO <sub>3-x</sub>         |                                            |                                            |                                            |                                            |                                                      | ✓                                   | ✓                                      | ✓                                     |
| PANI                       | ✓                                          | ✓                                          | ✓                                          | ✓                                          | ✓                                                    |                                     |                                        |                                       |
| PANI/MoO <sub>3-x</sub> -1 | ✓                                          | ✓                                          | ✓                                          | ✓                                          | ✓                                                    | ✓                                   | ✓                                      | ✓                                     |
| PANI/MoO <sub>3-x</sub> -2 | ✓                                          | ✓                                          | ✓                                          | ✓                                          | ✓                                                    | ✓                                   | ✓                                      | ✓                                     |
| PANI/MoO <sub>3-x</sub> -3 | ✓                                          | ✓                                          | ✓                                          | ✓                                          | ✓                                                    | ✓                                   | ✓                                      | ✓                                     |

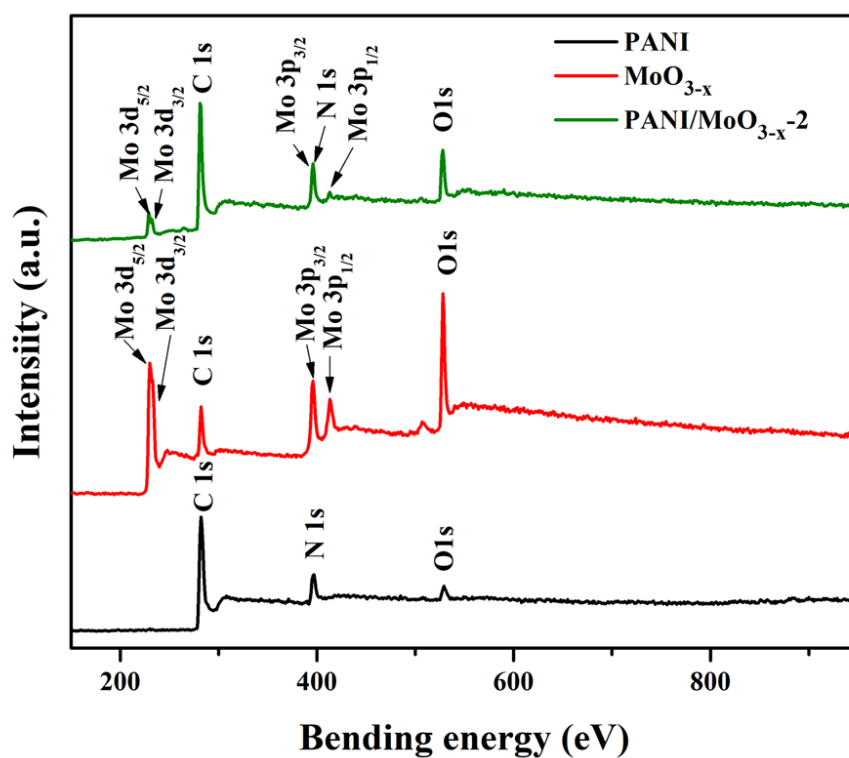**Fig. S3** XPS survey spectra of samples.

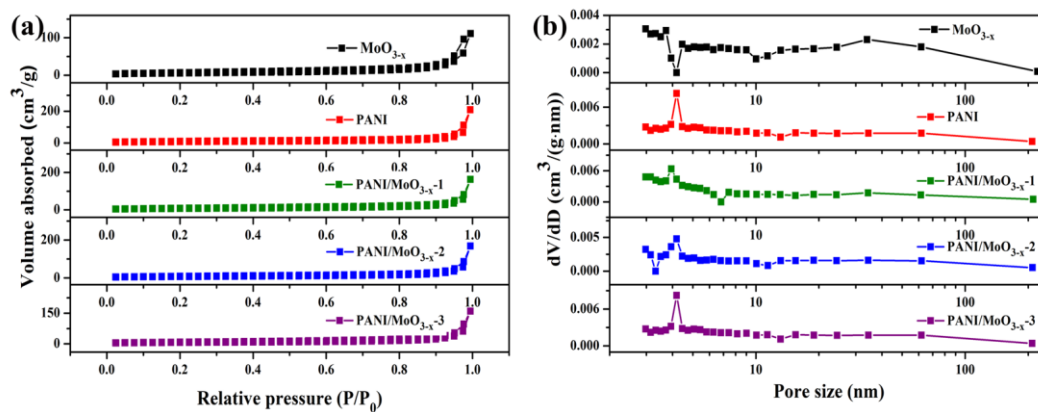

**Fig. S4** (a)  $N_2$  adsorption/desorption isotherms and (b) pore size distributions of samples.

**Table S2** The specific surface area and pore structure parameters of samples

| Samples                    | $S_{BET}^a$<br>( $m^2/g$ ) | $V_{total}^b$<br>( $cm^3/g$ ) | $V_{mec+mac}^c$<br>( $cm^3/g$ ) | $D_{avg}^d$<br>(nm) |
|----------------------------|----------------------------|-------------------------------|---------------------------------|---------------------|
| PANI                       | 27.434                     | 0.3244                        | 0.320                           | 47.2                |
| PANI/MoO <sub>3-x</sub> -1 | 25.609                     | 0.2533                        | 0.249                           | 39.6                |
| PANI/MoO <sub>3-x</sub> -2 | 26.017                     | 0.2608                        | 0.256                           | 40.1                |
| PANI/MoO <sub>3-x</sub> -3 | 23.150                     | 0.2480                        | 0.246                           | 42.8                |
| MoO <sub>3-x</sub>         | 21.344                     | 0.1726                        | 0.171                           | 32.3                |

<sup>a</sup> Total specific surface area calculated by Brunaur-Emmett-Teller (BET) method.

<sup>b</sup> Total pore volume calculated at  $P/P_0 = 0.99$ .

<sup>c</sup> Meso-/Macropore volume calculated from BJH method.

<sup>d</sup> Average pore diameter calculated from the equation of  $4V_t/S_{BET}$ .

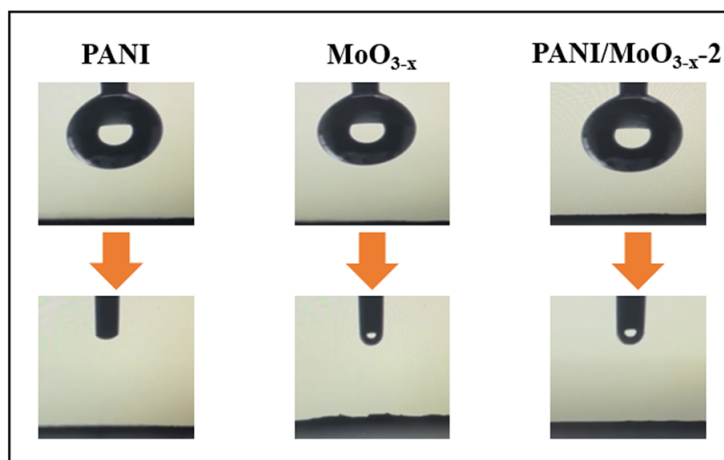

**Fig. S5** The contact angle images of samples.

**Table S3** Fitting values of equivalent circuit elements of samples.

| Equivalent circuit elements | Samples |                            |                            |                            |                    |
|-----------------------------|---------|----------------------------|----------------------------|----------------------------|--------------------|
|                             | PANI    | PANI/MoO <sub>3-x</sub> -1 | PANI/MoO <sub>3-x</sub> -2 | PANI/MoO <sub>3-x</sub> -3 | MoO <sub>3-x</sub> |
| $R_s$ ( $\Omega$ )          | 1.472   | 1.049                      | 1.018                      | 1.385                      | 1.083              |
| $CPE_T$                     | 0.00231 | 0.00023                    | 0.00019                    | 0.00029                    | 0.00041            |
| $CPE_P$                     | 0.74116 | 1.002                      | 0.78397                    | 0.91366                    | 0.94131            |
| $R_{ct}$ ( $\Omega$ )       | 1.743   | 1.776                      | 1.704                      | 1.982                      | 1.875              |
| $W_R$                       | 1.13    | 0.31872                    | 0.25659                    | 5.182                      | 6.334              |
| $W_T$                       | 0.00093 | 0.00052                    | 0.00032                    | 0.34182                    | 13.21              |
| $W_P$                       | 0.31133 | 0.30124                    | 0.30549                    | 0.36509                    | 0.42363            |

$R_s$  is the solution resistance.

$CPE_T$  is the capacitance when  $CPE_P=1$ .

$CPE_P$  is the constant phase element exponent.

$R_{ct}$  is the charge transfer resistance.

$W_R$  is the diffusion resistance (Warburg diffusion resistance).

$W_T$  is the diffusion time constant.

$W_P$  is a fractional exponent between 0 and 1.

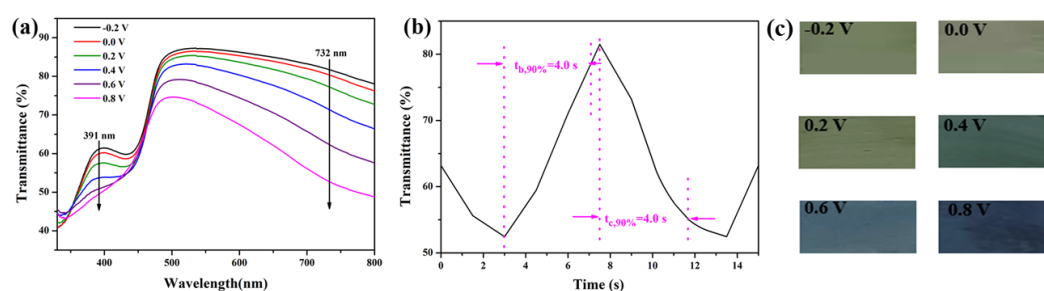

**Fig. S6** Electrochromic performance of PANI/MoO<sub>3-x</sub>-1: (a) UV-vis transmission spectra; (b) in situ optical response between the colored and bleached states from -0.2 to 0.8 V for 10 s at 732 nm; (c) the photos of color changes under different potentials.

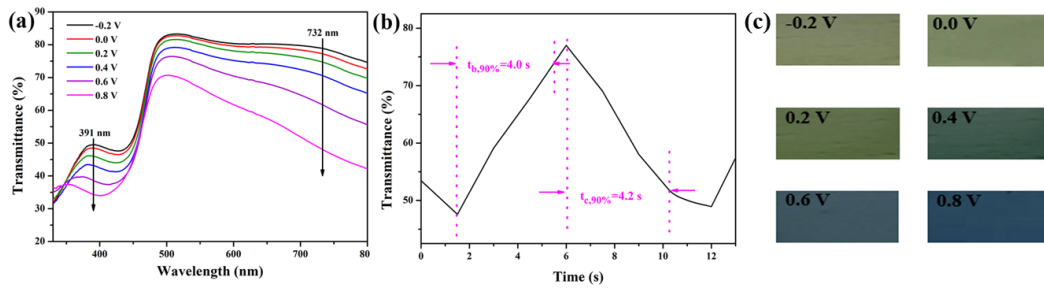

**Fig. S7** Electrochromic performance of PANI/MoO<sub>3-x</sub>-3: (a) UV-vis transmission spectra; (b) in situ optical response between the colored and bleached states from -0.2 to 0.8 V for 10 s at 732 nm; (c) the photos of color changes under different potentials.

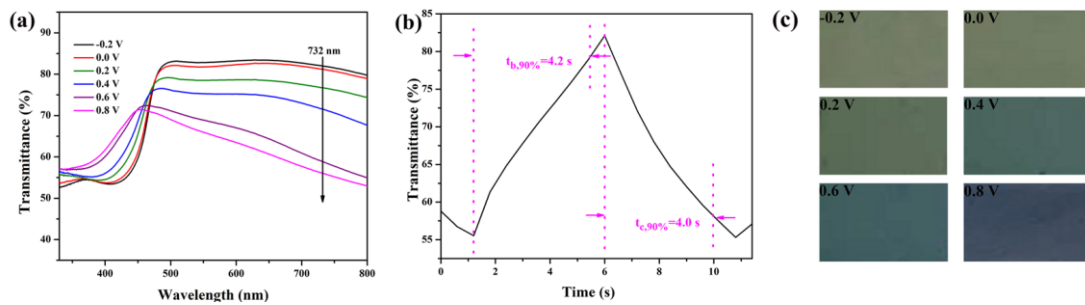

**Fig. S8** Electrochromic performance of PANI: (a) UV-vis transmission spectra; (b) in situ optical response between the colored and bleached states from -0.2 to 0.8 V for 10 s at 732 nm; (c) the photos of color changes under different potentials.
